# Supplementary material for: Noncovalent bonding assessment by pair distribution function
Source: Royal Society of Chemistry journal article supplement (doi:10.1039/d2fd00159d), 2023-01-01
Supplement: d2fd00159d1.pdf [file d2fd00159d1.pdf]

## Supporting Information

### Noncovalent bonding assessment by Pair Distribution Function

Lucy K. Saunders, Daniel Irving, Philip A. Chater and Maria Diaz-Lopez\*

E-mail: maria.diaz-lopez@diamond.ac.uk

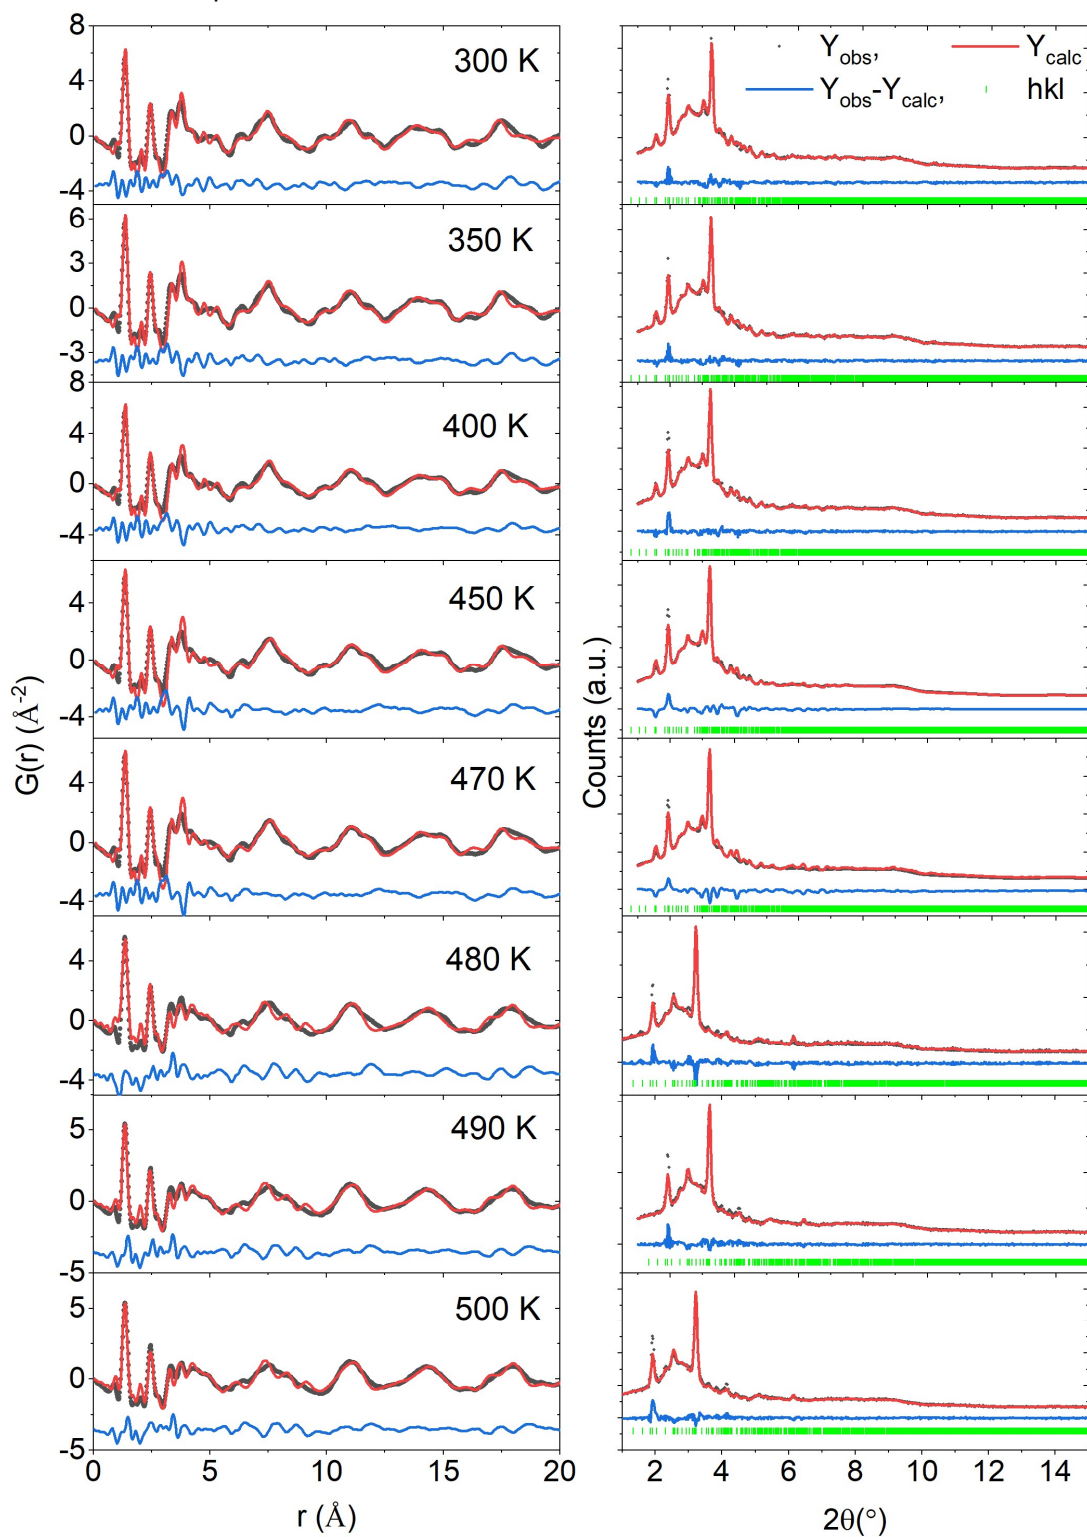

Figure S1. Magnified view of the Joint PDF (left) and Rietveld fits (right) using the HAZFAP01 model (350-470 K) and HAZFAP07 (480-500 K). The fits were done in the 0-50  $\text{\AA}$  and 1-60 $^\circ$  range.

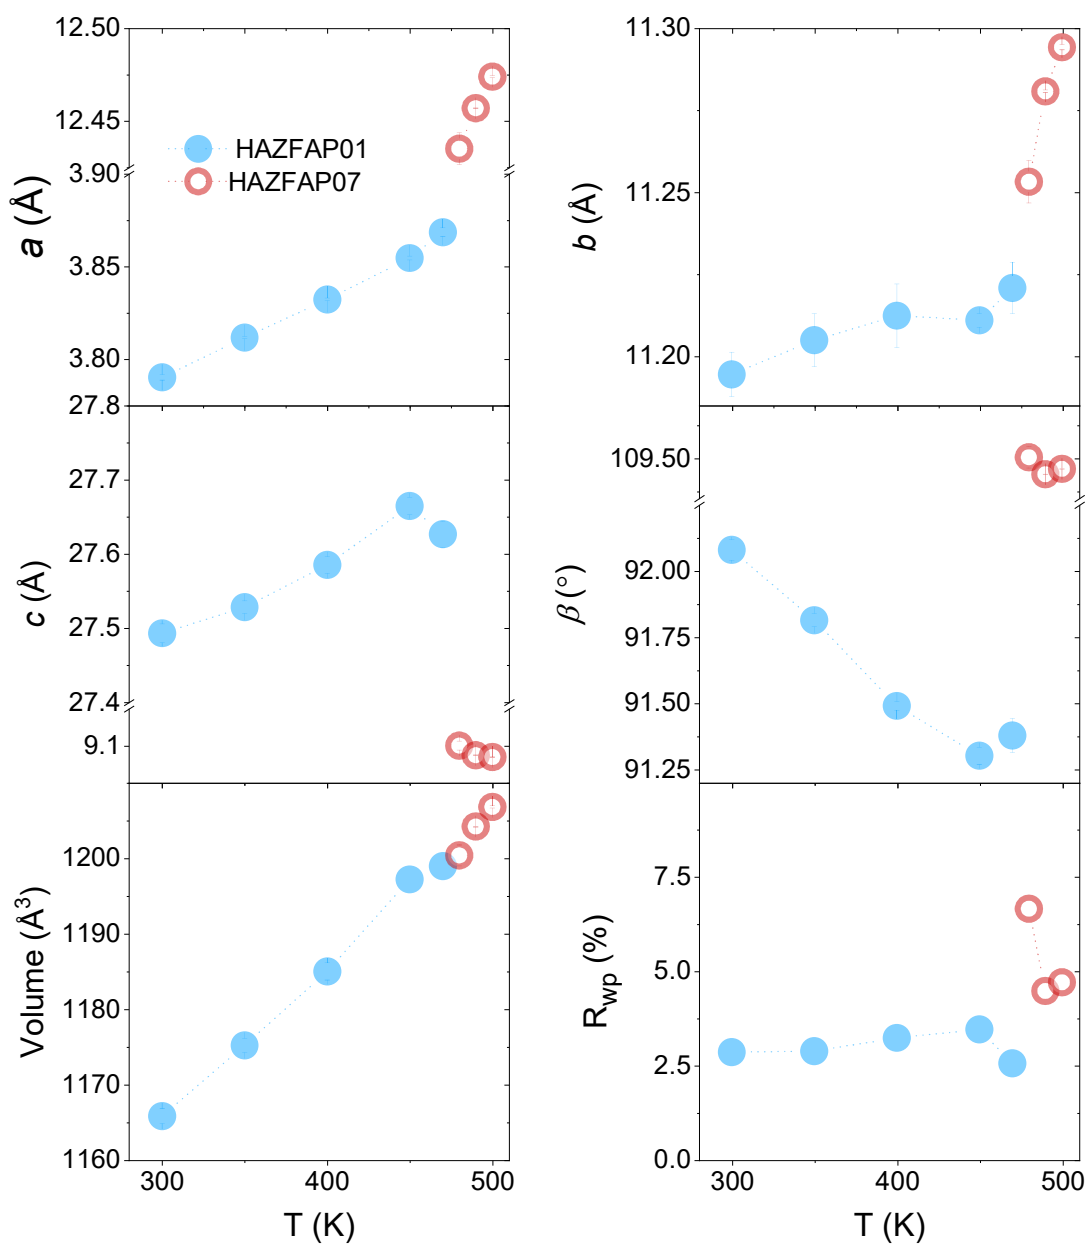

Figure S2. Refined lattice parameters and  $R_{wp}$  of the combined refinement.

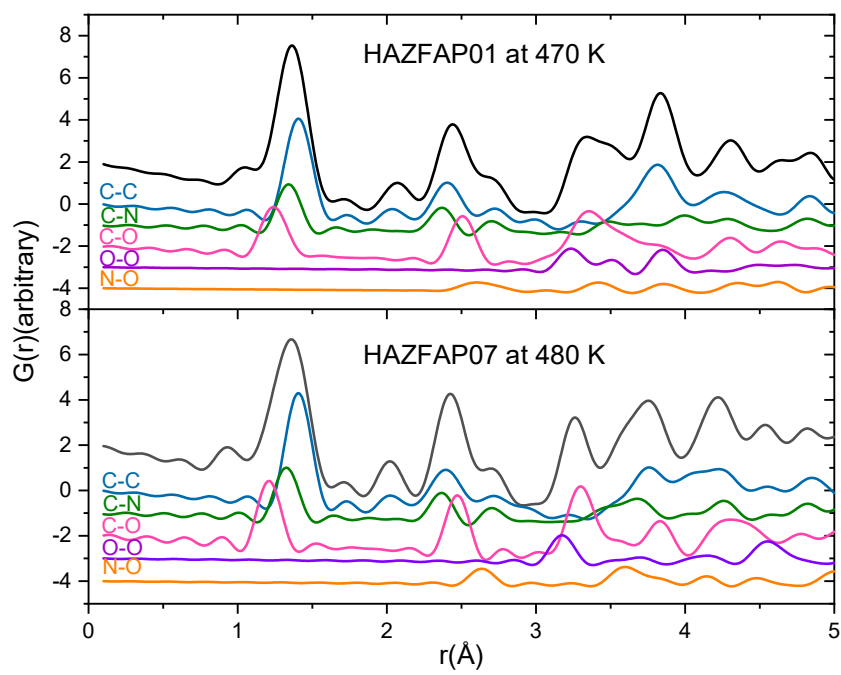

Figure 3. Simulated XPDF of BIPY:SQA models refined against PDF and Bragg data with C-C, C-N, C-O, O-O and N-O partials indicated at 470 K and 480 K.
